# Supplementary material for: Trends in new HIV diagnoses and factors contributing to late diagnosis among migrant populations in EU/EEA countries, 2014 to 2023
Source: PubMed Central journal article supplement (PMC11605804; doi:10.2807/1560-7917.es.2024.29.48.2400759), 2024-11-28
Supplement: 24-00759_REYES_Supplement.pdf [file 24-00759_REYES_Supplement.pdf]

**This supplementary material is hosted by *Eurosurveillance* as supporting information alongside the article [Trends in new HIV diagnoses and factors contributing to late diagnosis among migrant populations in EU/EEA countries, 2014 to 2023], on behalf of the authors, who remain responsible for the accuracy and appropriateness of the content. The same standards for ethics, copyright, attributions and permissions as for the article apply. Supplements are not edited by *Eurosurveillance* and the journal is not responsible for the maintenance of any links or email addresses provided therein.**

**Table S1. Country distribution by reporting subregion**

| Reporting subregions                                                                                                                                       |                                                                                                                             |                                                                                                                          |                                                                                             |
|------------------------------------------------------------------------------------------------------------------------------------------------------------|-----------------------------------------------------------------------------------------------------------------------------|--------------------------------------------------------------------------------------------------------------------------|---------------------------------------------------------------------------------------------|
| Eastern EU/EEA subregion                                                                                                                                   | Southern EU/EEA subregion                                                                                                   | Western EU/EEA subregion                                                                                                 | Northern EU/EEA subregion                                                                   |
| *Bulgaria (BG)<br>Czech Republic (CZ)<br>*Hungary (HU)<br>*Poland (PL)<br>*Romania (RO)<br>Slovakia (SK)<br>Estonia (EE)<br>Latvia (LV)<br>*Lithuania (LT) | *Croatia (HR)<br>Cyprus (CY)<br>Greece (EL)<br>*Italy (IT)<br>*Malta (MT)<br>Portugal (PT)<br>*Slovenia (SI)<br>*Spain (ES) | Austria (AT)<br>Belgium (BE)<br>France (FR)<br>Germany (DE)<br>Liechtenstein (LI)<br>Luxembourg (LU)<br>Netherlands (NL) | Denmark (DK)<br>*Finland (FI)<br>Iceland (IS)<br>Ireland (IE)<br>Norway (NO)<br>Sweden (SE) |

\*These countries were excluded from the analyses because they were unable to classify diagnoses as either new or previously positive.

**Table S2. Country distribution by region of origin based on UNAIDS designation**

| <b>Geographical region of origin</b> |                                      |                       |                                       |
|--------------------------------------|--------------------------------------|-----------------------|---------------------------------------|
| <b>Western Europe</b>                | <b>Central Europe</b>                | <b>Eastern Europe</b> | <b>Latin America and Caribbean</b>    |
| Andorra (AD)                         | Bosnia and Herzegovina (BA)          | Armenia (AM)          | Antigua and Barbuda (AG)              |
| Austria (AT)                         | Bulgaria (BG)                        | Azerbaijan (AZ)       | Netherlands Antilles (AN)             |
| Belgium (BE)                         | Croatia (HR)                         | Belarus (BY)          | Argentina (AR)                        |
| Denmark (DK)                         | Cyprus (CY)                          | Estonia (EE)          | Uruguay (UY)                          |
| Finland (FI)                         | Czech Republic (CZ)                  | Georgia (GE)          | Bahamas (BS)                          |
| Faroe Islands (FO)                   | Hungary (HU)                         | Kazakhstan (KZ)       | Barbados (BB)                         |
| France (FR)                          | North Macedonia (MK)                 | Kyrgyzstan (KG)       | Cuba (CU)                             |
| Germany (DE)                         | Poland (PL)                          | Latvia (LV)           | Dominica (DM)                         |
| Greenland (GL)                       | Romania (RO)                         | Lithuania (LT)        | Dominican Republic (DO)               |
| Greece (EL)                          | Serbia and Montenegro (CS)           | Montenegro (ME)       | Grenada (GD)                          |
| Iceland (IS)                         | * (no longer in use)*                | Moldova (MD)          | Guadeloupe (GP)                       |
| Ireland (IE)                         | Slovakia (SK)                        | Russia (RU)           | Haiti (HT)                            |
| Israel (IL)                          | Slovenia (SI)                        | Tajikistan (TJ)       | Jamaica (JM)                          |
| Italy (IT)                           | Turkey (TR)                          | Turkmenistan (TM)     | Saint Kitts and Nevis (KN)            |
| Liechtenstein (LI)                   | Yugoslavia (YU) *(no longer in use)* | Ukraine (UA)          | Saint Lucia (LC)                      |
| Luxembourg (LU)                      | Kosovo (XK)                          | Uzbekistan (UZ)       | Montserrat (MS)                       |
| Malta (MT)                           | Serbia (RS)                          |                       | Martinique (MQ)                       |
| Monaco (MC)                          |                                      |                       | Trinidad and Tobago (TT)              |
| Netherlands (NL)                     |                                      |                       | Saint Vincent and the Grenadines (VC) |
| Norway (NO)                          |                                      |                       | Belize (BZ)                           |
| Portugal (PT)                        |                                      |                       | Bolivia (BO)                          |
| San Marino (SM)                      |                                      |                       | Brazil (BR)                           |
| Spain (ES)                           |                                      |                       | Chile (CL)                            |
| Sweden (SE)                          |                                      |                       | Colombia (CO)                         |
| Switzerland (CH)                     |                                      |                       | Costa Rica (CR)                       |
| United Kingdom (UK)                  |                                      |                       | Ecuador (EC)                          |
|                                      |                                      |                       | El Salvador (SV)                      |
|                                      |                                      |                       | French Guiana (GF)                    |
|                                      |                                      |                       | Guatemala (GT)                        |
|                                      |                                      |                       | Guyana (GY)                           |
|                                      |                                      |                       | Honduras (HN)                         |
|                                      |                                      |                       | Mexico (MX)                           |
|                                      |                                      |                       | Nicaragua (NI)                        |
|                                      |                                      |                       | Panama (PA)                           |
|                                      |                                      |                       | Paraguay (PY)                         |
|                                      |                                      |                       | Peru (PE)                             |
|                                      |                                      |                       | Puerto Rico (PR)                      |
|                                      |                                      |                       | Turks and Caicos (TC)                 |

|  |  |  |                                 |
|--|--|--|---------------------------------|
|  |  |  | Venezuela (VE)<br>Suriname (SR) |
|--|--|--|---------------------------------|

| <b>Geographical region of origin</b>  |                                  |                                 |                           |
|---------------------------------------|----------------------------------|---------------------------------|---------------------------|
| <b>Sub Saharan Africa</b>             |                                  | <b>South and Southeast Asia</b> | <b>Other</b>              |
| Angola (AO)                           | Lesotho (LS)                     | China (CN)                      | Algeria (DZ)              |
| Benin (BJ)                            | Liberia (LR)                     | Macau (MO)                      | Bahrain (BH)              |
| Botswana (BW)                         | Madagascar (MG)                  | Fiji (FJ)                       | Egypt (EG)                |
| Burkina Faso (BF)                     | Malawi (MW)                      | Japan (JP)                      | Iraq (IQ)                 |
| Burundi (BI)                          | Mali (ML)                        | North Korea (KP)                | Jordan (JO)               |
| Cameroon (CM)                         | Mauritania (MR)                  | South Korea (KR)                | Kuwait (KW)               |
| Central African Republic (CF)         | Mauritius (MU)                   | Mongolia (MN)                   | Lebanon (LB)              |
| Cape Verde (CV)                       | Mozambique (MZ)                  | Papua New Guinea (PG)           | Libya (LY)                |
| Comoros (KM)                          | Namibia (NA)                     | Solomon Islands (SB)            | Morocco (MA)              |
| Republic of the Congo (CG)            | Namibia (NAM)                    | Tonga (TO)                      | Oman (OM)                 |
| Democratic Republic of the Congo (CD) | *(alternative code for Namibia)* | Taiwan (TW)                     | Qatar (QA)                |
| Ivory Coast (CI)                      | Nigeria (NG)                     | Bangladesh (BD)                 | Saudi Arabia (SA)         |
| Djibouti (DJ)                         | Rwanda (RW)                      | Bhutan (BT)                     | Sudan (SD)                |
| Equatorial Guinea (GQ)                | Senegal (SN)                     | Brunei (BN)                     | Soviet Union (SU)         |
| Eritrea (ER)                          | Sierra Leone (SL)                | Cambodia (KH)                   | *(no longer in use)*      |
| Ethiopia (ET)                         | Somalia (SO)                     | Hong Kong (HK)                  | Syria (SY)                |
| Gabon (GA)                            | South Africa (ZA)                | India (IN)                      | Tunisia (TN)              |
| Gambia (GM)                           | Eswatini (SZ)                    | Indonesia (ID)                  | United Arab Emirates (AE) |
| Ghana (GH)                            | Tanzania (TZ)                    | Iran (IR)                       | Yemen (YE)                |
| Guinea (GN)                           | Togo (TG)                        | Laos (LA)                       | United States (US)        |
| GuineaBissau (GW)                     | Uganda (UG)                      | Malaysia (MY)                   | Christmas Island (CX)     |
| Kenya (KE)                            | Zambia (ZM)                      | Maldives (MV)                   | New Zealand (NZ)          |
|                                       | Zimbabwe (ZW)                    | Myanmar (MM)                    | Canada (CA)               |
|                                       | Mayotte (YT)                     | Nepal (NP)                      | Australia (AU)            |
|                                       | Seychelles (SC)                  | Pakistan (PK)                   | Palestine (PS)            |
|                                       | Chad (TD)                        | Philippines (PH)                |                           |
|                                       | Niger (NE)                       | Singapore (SG)                  |                           |
|                                       | South Sudan (SS)                 | Sri Lanka (LK)                  |                           |
|                                       |                                  | Thailand (TH)                   |                           |
|                                       |                                  | Vietnam (VN)                    |                           |
|                                       |                                  | TimorLeste (TL)                 |                           |
|                                       |                                  | Afghanistan (AF)                |                           |

**Table S3.** Sociodemographic characteristics of migrant and non-migrant populations diagnosed with HIV in EU/EEA countries by sex (2014–2023), n=123,326.

| Variable                                 | Total             | Non-migrants      | Migrants born in the EU/EEA | Migrants born out the EU/EEA | Western Europe    | Central Europe   | Eastern Europe    | Sub-Saharan Africa | Latin America and Caribbean | South and South-east Asia | Other             | Unknown           |
|------------------------------------------|-------------------|-------------------|-----------------------------|------------------------------|-------------------|------------------|-------------------|--------------------|-----------------------------|---------------------------|-------------------|-------------------|
| <b>Women</b>                             | 25,751            | 7,751             | 1,026                       | 16,974                       | 391               | 812              | 2,176             | 12,230             | 1,095                       | 833                       | 463               | 6,838             |
| <b>Median age, years (IQR)</b>           | 36<br>(29, 45)    | 39<br>(29, 51)    | 34<br>(27, 43)              | 35<br>(29, 43)               | 39<br>(29, 50)    | 34<br>(27, 43)   | 38<br>(32, 45)    | 34<br>(28, 42)     | 37<br>(30, 45)              | 39<br>(33, 45)            | 35<br>(27, 46)    | 38 (30, 48)       |
| <b>Age category</b>                      |                   |                   |                             |                              |                   |                  |                   |                    |                             |                           |                   |                   |
| ≤18                                      | 751<br>(2.9%)     | 195<br>(2.5%)     | 20<br>(1.9%)                | 536<br>(3.2%)                | 6<br>(1.5%)       | 17<br>(2.1%)     | 64<br>(2.9%)      | 413<br>(3.4%)      | 27<br>(2.5%)                | 12<br>(1.4%)              | 17<br>(3.7%)      | 212<br>(3.1%)     |
| 19-29                                    | 6,289<br>(24.4%)  | 1,785<br>(23.0%)  | 323<br>(31.5%)              | 4,181<br>(24.6%)             | 94<br>(24.0%)     | 260<br>(32.0%)   | 314<br>(14.4%)    | 3,358<br>(27.5%)   | 235<br>(21.5%)              | 108<br>(13.0%)            | 135<br>(29.2%)    | 1,351<br>(19.8%)  |
| 30-50                                    | 14,476<br>(56.2%) | 3,681<br>(47.5%)  | 543<br>(52.9%)              | 10,252<br>(60.4%)            | 198<br>(50.6%)    | 438<br>(53.9%)   | 1,518<br>(69.8%)  | 7,140<br>(58.4%)   | 659<br>(60.2%)              | 610<br>(73.2%)            | 232<br>(50.1%)    | 3,946<br>(57.7%)  |
| >50                                      | 4,219<br>(16.4%)  | 2,084<br>(26.9%)  | 137<br>(13.4%)              | 1,998<br>(11.8%)             | 91<br>(23.3%)     | 96<br>(11.8%)    | 276<br>(12.7%)    | 1,317<br>(10.8%)   | 173<br>(15.8%)              | 103<br>(12.4%)            | 79<br>(17.1%)     | 1,314<br>(19.2%)  |
| Unknown                                  | 16<br>(0.1%)      | 6<br>(0.1%)       | 3<br>(0.3%)                 | 7<br>(0.0%)                  | 2<br>(0.5%)       | 1<br>(0.1%)      | 4<br>(0.2%)       | 2<br>(0.0%)        | 1<br>(0.1%)                 | 0<br>(0.0%)               | 0<br>(0.0%)       | 15<br>(0.2%)      |
| <b>Mode of transmission</b>              |                   |                   |                             |                              |                   |                  |                   |                    |                             |                           |                   |                   |
| Heterosexual transmission (women)        | 21,483<br>(83.4%) | 5,974<br>(77.1%)  | 745<br>(72.6%)              | 14,764<br>(87.0%)            | 288<br>(73.7%)    | 591<br>(72.8%)   | 1,631<br>(75.0%)  | 10,951<br>(89.5%)  | 987<br>(90.1%)              | 713<br>(85.6%)            | 348<br>(75.2%)    | 1,145<br>(16.7%)  |
| Injecting drug use                       | 933<br>(3.6%)     | 650<br>(8.4%)     | 78<br>(7.6%)                | 205<br>(1.2%)                | 28<br>(7.2%)      | 43<br>(5.3%)     | 180<br>(8.3%)     | 17<br>(0.1%)       | 3<br>(0.3%)                 | 5<br>(0.6%)               | 7<br>(1.5%)       | 78<br>(1.1%)      |
| Mother to child transmission             | 313<br>(1.2%)     | 70<br>(0.9%)      | 13<br>(1.3%)                | 230<br>(1.4%)                | 7<br>(1.8%)       | 8<br>(1.0%)      | 50<br>(2.3%)      | 149<br>(1.2%)      | 7<br>(0.6%)                 | 10<br>(1.2%)              | 12<br>(2.6%)      | 23<br>(0.3%)      |
| Other routes                             | 128<br>(0.5%)     | 8<br>(0.1%)       | 1<br>(0.1%)                 | 119<br>(0.7%)                | 0<br>(0.0%)       | 1<br>(0.1%)      | 15<br>(0.7%)      | 83<br>(0.7%)       | 5<br>(0.5%)                 | 10<br>(1.2%)              | 6<br>(1.3%)       | 2<br>(0.0%)       |
| Unknown                                  | 2,894<br>(11.2%)  | 1,049<br>(13.5%)  | 189<br>(18.4%)              | 1,656<br>(9.8%)              | 68<br>(17.4%)     | 169<br>(20.8%)   | 300<br>(13.8%)    | 1,030<br>(8.4%)    | 93<br>(8.5%)                | 95<br>(11.4%)             | 90<br>(19.4%)     | 5,590<br>(81.7%)  |
| <b>Median CD4+ count, cells/μl (IQR)</b> | 322<br>(146, 524) | 364<br>(157, 577) | 315<br>(128, 545)           | 304<br>(143, 500)            | 319<br>(154, 552) | 311<br>(97, 499) | 340<br>(108, 598) | 305<br>(157, 492)  | 322<br>(150, 502)           | 166<br>(40, 362)          | 338<br>(155, 521) | 302<br>(100, 518) |
| <b>CD4+ category</b>                     |                   |                   |                             |                              |                   |                  |                   |                    |                             |                           |                   |                   |
| <200 CD4 cell count/μl                   | 5,669<br>(22.0%)  | 1,569<br>(20.2%)  | 208<br>(20.3%)              | 3,892<br>(22.9%)             | 86<br>(22.0%)     | 175<br>(21.6%)   | 421<br>(19.3%)    | 2,786<br>(22.8%)   | 269<br>(24.6%)              | 260<br>(31.2%)            | 103<br>(22.2%)    | 227<br>(3.3%)     |

| Variable                       | Total             | Non-migrants      | Migrants born in the EU/EEA | Migrants born out the EU/EEA | Western Europe   | Central Europe   | Eastern Europe   | Sub-Saharan Africa | Latin America and Caribbean | South and South-east Asia | Other            | Unknown          |
|--------------------------------|-------------------|-------------------|-----------------------------|------------------------------|------------------|------------------|------------------|--------------------|-----------------------------|---------------------------|------------------|------------------|
| 200 to < 350 CD4 cell count/µl | 3,717<br>(14.4%)  | 970<br>(12.5%)    | 122<br>(11.9%)              | 2,625<br>(15.5%)             | 58<br>(14.8%)    | 84<br>(10.3%)    | 199<br>(9.1%)    | 2,069<br>(16.9%)   | 181<br>(16.5%)              | 97<br>(11.6%)             | 59<br>(12.7%)    | 127<br>(1.9%)    |
| 350 to < 500 CD4 cell count/µl | 3,286<br>(12.8%)  | 1,030<br>(13.3%)  | 105<br>(10.2%)              | 2,151<br>(12.7%)             | 44<br>(11.3%)    | 91<br>(11.2%)    | 178<br>(8.2%)    | 1,653<br>(13.5%)   | 166<br>(15.2%)              | 55<br>(6.6%)              | 69<br>(14.9%)    | 100<br>(1.5%)    |
| >= 500 CD4 cell count/µl       | 4,830<br>(18.8%)  | 1,745<br>(22.5%)  | 181<br>(17.6%)              | 2,904<br>(17.1%)             | 82<br>(21.0%)    | 116<br>(14.3%)   | 418<br>(19.2%)   | 2,102<br>(17.2%)   | 210<br>(19.2%)              | 73<br>(8.8%)              | 84<br>(18.1%)    | 173<br>(2.5%)    |
| Unknown                        | 8,249<br>(32.0%)  | 2,437<br>(31.4%)  | 410<br>(40.0%)              | 5,402<br>(31.8%)             | 121<br>(30.9%)   | 346<br>(42.6%)   | 960<br>(44.1%)   | 3,620<br>(29.6%)   | 269<br>(24.6%)              | 348<br>(41.8%)            | 148<br>(32.0%)   | 6,211<br>(90.8%) |
| <b>AIDS</b>                    | 3,395<br>(13.2%)  | 1,114<br>(14.4%)  | 162<br>(15.8%)              | 2,119<br>(12.5%)             | 48<br>(12.3%)    | 142<br>(17.5%)   | 329<br>(15.1%)   | 1,370<br>(11.2%)   | 159<br>(14.5%)              | 186<br>(22.3%)            | 47<br>(10.2%)    | 178<br>(2.6%)    |
| <b>Reporting EU/EEA region</b> |                   |                   |                             |                              |                  |                  |                  |                    |                             |                           |                  |                  |
| Eastern EU/EEA countries       | 1,508<br>(5.9%)   | 1,206<br>(15.6%)  | 19<br>(1.9%)                | 283<br>(1.7%)                | 3<br>(0.8%)      | 9<br>(1.1%)      | 261<br>(12.0%)   | 10<br>(0.1%)       | 4<br>(0.4%)                 | 13<br>(1.6%)              | 2<br>(0.4%)      | 647<br>(9.5%)    |
| Southern EU/EEA countries      | 4,237<br>(16.5%)  | 1,914<br>(24.7%)  | 68<br>(6.6%)                | 2,255<br>(13.3%)             | 43<br>(11.0%)    | 144<br>(17.7%)   | 192<br>(8.8%)    | 1,701<br>(13.9%)   | 197<br>(18.0%)              | 31<br>(3.7%)              | 15<br>(3.2%)     | 314<br>(4.6%)    |
| Western EU/EEA countries       | 17,833<br>(69.3%) | 4,257<br>(54.9%)  | 861<br>(83.9%)              | 12,715<br>(74.9%)            | 313<br>(80.1%)   | 622<br>(76.6%)   | 1,552<br>(71.3%) | 9,356<br>(76.5%)   | 855<br>(78.1%)              | 471<br>(56.5%)            | 407<br>(87.9%)   | 5,599<br>(81.9%) |
| Northern EU/EEA countries      | 2,173<br>(8.4%)   | 374<br>(4.8%)     | 78<br>(7.6%)                | 1,721<br>(10.1%)             | 32<br>(8.2%)     | 37<br>(4.6%)     | 171<br>(7.9%)    | 1,163<br>(9.5%)    | 39<br>(3.6%)                | 318<br>(38.2%)            | 39<br>(8.4%)     | 278<br>(4.1%)    |
| <b>Men</b>                     | 76,921            | 48,023            | 5,280                       | 23,618                       | 3,058            | 3,863            | 3,140            | 8,940              | 5,117                       | 2,250                     | 2,530            | 13,012           |
| <b>Median age, years (IQR)</b> | 37<br>(29, 47)    | 39<br>(30, 50)    | 35<br>(29, 44)              | 35<br>(28, 44)               | 39<br>(30, 48)   | 34<br>(28, 42)   | 38<br>(31, 44)   | 37<br>(28, 46)     | 31<br>(26, 38)              | 32<br>(27, 40)            | 35<br>(28, 44)   | 39<br>(30, 50)   |
| <b>Age category</b>            |                   |                   |                             |                              |                  |                  |                  |                    |                             |                           |                  |                  |
| ≤18                            | 1,038<br>(1.3%)   | 418<br>(0.9%)     | 39<br>(0.7%)                | 581<br>(2.5%)                | 17<br>(0.6%)     | 24<br>(0.6%)     | 76<br>(2.4%)     | 408<br>(4.6%)      | 25<br>(0.5%)                | 26<br>(1.2%)              | 44<br>(1.7%)     | 231<br>(1.8%)    |
| 19-29                          | 19,672<br>(25.6%) | 11,438<br>(23.8%) | 1,449<br>(27.4%)            | 6,785<br>(28.7%)             | 722<br>(23.6%)   | 1,149<br>(29.7%) | 517<br>(16.5%)   | 2,141<br>(23.9%)   | 2,170<br>(42.4%)            | 803<br>(35.7%)            | 732<br>(28.9%)   | 2,634<br>(20.2%) |
| 30-50                          | 41,459<br>(53.9%) | 24,939<br>(51.9%) | 3,149<br>(59.6%)            | 13,371<br>(56.6%)            | 1,728<br>(56.5%) | 2,306<br>(59.7%) | 2,252<br>(71.7%) | 4,998<br>(55.9%)   | 2,590<br>(50.6%)            | 1,228<br>(54.6%)          | 1,418<br>(56.0%) | 7,087<br>(54.5%) |
| >50                            | 14,659<br>(19.1%) | 11,173<br>(23.3%) | 636<br>(12.0%)              | 2,850<br>(12.1%)             | 587<br>(19.2%)   | 376<br>(9.7%)    | 291<br>(9.3%)    | 1,384<br>(15.5%)   | 329<br>(6.4%)               | 186<br>(8.3%)             | 333<br>(13.2%)   | 3,006<br>(23.1%) |

| Variable                                 | Total             | Non-migrants      | Migrants born in the EU/EEA | Migrants born out the EU/EEA | Western Europe    | Central Europe    | Eastern Europe    | Sub-Saharan Africa | Latin America and Caribbean | South and South-east Asia | Other             | Unknown           |
|------------------------------------------|-------------------|-------------------|-----------------------------|------------------------------|-------------------|-------------------|-------------------|--------------------|-----------------------------|---------------------------|-------------------|-------------------|
| Unknown                                  | 93<br>(0.1%)      | 55<br>(0.1%)      | 7<br>(0.1%)                 | 31<br>(0.1%)                 | 4<br>(0.1%)       | 8<br>(0.2%)       | 4<br>(0.1%)       | 9<br>(0.1%)        | 3<br>(0.1%)                 | 7<br>(0.3%)               | 3<br>(0.1%)       | 54<br>(0.4%)      |
| <b>Mode of transmission</b>              |                   |                   |                             |                              |                   |                   |                   |                    |                             |                           |                   |                   |
| Sex between men                          | 45,612<br>(59.3%) | 31,832<br>(66.3%) | 3,338<br>(63.2%)            | 10,442<br>(44.2%)            | 2,165<br>(70.8%)  | 2,226<br>(57.6%)  | 840<br>(26.8%)    | 1,726<br>(19.3%)   | 3,987<br>(77.9%)            | 1,442<br>(64.1%)          | 1,394<br>(55.1%)  | 1,766<br>(13.6%)  |
| Heterosexual transmission (men)          | 17,606<br>(22.9%) | 8,239<br>(17.2%)  | 736<br>(13.9%)              | 8,631<br>(36.5%)             | 444<br>(14.5%)    | 558<br>(14.4%)    | 804<br>(25.6%)    | 5,959<br>(66.7%)   | 759<br>(14.8%)              | 283<br>(12.6%)            | 560<br>(22.1%)    | 918<br>(7.1%)     |
| Injecting drug use                       | 3,644<br>(4.7%)   | 2,124<br>(4.4%)   | 430<br>(8.1%)               | 1,090<br>(4.6%)              | 106<br>(3.5%)     | 311<br>(8.1%)     | 803<br>(25.6%)    | 50<br>(0.6%)       | 31<br>(0.6%)                | 126<br>(5.6%)             | 93<br>(3.7%)      | 380<br>(2.9%)     |
| Mother to child transmission             | 302<br>(0.4%)     | 71<br>(0.1%)      | 14<br>(0.3%)                | 217<br>(0.9%)                | 7<br>(0.2%)       | 4<br>(0.1%)       | 55<br>(1.8%)      | 145<br>(1.6%)      | 2<br>(0.0%)                 | 7<br>(0.3%)               | 11<br>(0.4%)      | 19<br>(0.1%)      |
| Other routes                             | 89<br>(0.1%)      | 26<br>(0.1%)      | 14<br>(0.3%)                | 49<br>(0.2%)                 | 6<br>(0.2%)       | 12<br>(0.3%)      | 14<br>(0.4%)      | 23<br>(0.3%)       | 1<br>(0.0%)                 | 3<br>(0.1%)               | 4<br>(0.2%)       | 3<br>(0.0%)       |
| Unknown                                  | 9,668<br>(12.6%)  | 5,731<br>(11.9%)  | 748<br>(14.2%)              | 3,189<br>(13.5%)             | 330<br>(10.8%)    | 752<br>(19.5%)    | 624<br>(19.9%)    | 1,037<br>(11.6%)   | 337<br>(6.6%)               | 389<br>(17.3%)            | 468<br>(18.5%)    | 9,926<br>(76.3%)  |
| <b>Median CD4+ count, cells/μl (IQR)</b> | 358<br>(170, 549) | 373<br>(179, 562) | 385<br>(192, 582)           | 320<br>(150, 510)            | 395<br>(215, 593) | 369<br>(160, 570) | 361<br>(149, 568) | 280<br>(127, 450)  | 367<br>(203, 550)           | 295<br>(127, 472)         | 358<br>(181, 547) | 314<br>(123, 534) |
| <b>CD4+ category</b>                     |                   |                   |                             |                              |                   |                   |                   |                    |                             |                           |                   |                   |
| <200 CD4 cell count/μl                   | 15,286<br>(19.9%) | 9,164<br>(19.1%)  | 922<br>(17.5%)              | 5,200<br>(22.0%)             | 511<br>(16.7%)    | 736<br>(19.1%)    | 513<br>(16.3%)    | 2,410<br>(27.0%)   | 934<br>(18.3%)              | 513<br>(22.8%)            | 505<br>(20.0%)    | 603<br>(4.6%)     |
| 200 to < 350 CD4 cell count/μl           | 11,071<br>(14.4%) | 6,567<br>(13.7%)  | 684<br>(13.0%)              | 3,820<br>(16.2%)             | 432<br>(14.1%)    | 459<br>(11.9%)    | 320<br>(10.2%)    | 1,659<br>(18.6%)   | 874<br>(17.1%)              | 362<br>(16.1%)            | 398<br>(15.7%)    | 343<br>(2.6%)     |
| 350 to < 500 CD4 cell count/μl           | 11,171<br>(14.5%) | 7,196<br>(15.0%)  | 760<br>(14.4%)              | 3,215<br>(13.6%)             | 451<br>(14.7%)    | 504<br>(13.0%)    | 312<br>(9.9%)     | 1,220<br>(13.6%)   | 837<br>(16.4%)              | 285<br>(12.7%)            | 366<br>(14.5%)    | 310<br>(2.4%)     |
| >= 500 CD4 cell count/μl                 | 16,593<br>(21.6%) | 11,000<br>(22.9%) | 1,239<br>(23.5%)            | 4,354<br>(18.4%)             | 797<br>(26.1%)    | 834<br>(21.6%)    | 566<br>(18.0%)    | 1,324<br>(14.8%)   | 1,184<br>(23.1%)            | 318<br>(14.1%)            | 570<br>(22.5%)    | 495<br>(3.8%)     |
| Unknown                                  | 22,800<br>(29.6%) | 14,096<br>(29.4%) | 1,675<br>(31.7%)            | 7,029<br>(29.8%)             | 867<br>(28.4%)    | 1,330<br>(34.4%)  | 1,429<br>(45.5%)  | 2,327<br>(26.0%)   | 1,288<br>(25.2%)            | 772<br>(34.3%)            | 691<br>(27.3%)    | 11,261<br>(86.5%) |
| <b>AIDS</b>                              | 10,627<br>(13.8%) | 6,754<br>(14.1%)  | 679<br>(12.9%)              | 3,194<br>(13.5%)             | 355<br>(11.6%)    | 560<br>(14.5%)    | 434<br>(13.8%)    | 1,386<br>(15.5%)   | 465<br>(9.1%)               | 345<br>(15.3%)            | 328<br>(13.0%)    | 500<br>(3.8%)     |

| Variable                       | Total             | Non-migrants      | Migrants born in the EU/EEA | Migrants born out the EU/EEA | Western Europe   | Central Europe   | Eastern Europe   | Sub-Saharan Africa | Latin America and Caribbean | South and South-east Asia | Other            | Unknown           |
|--------------------------------|-------------------|-------------------|-----------------------------|------------------------------|------------------|------------------|------------------|--------------------|-----------------------------|---------------------------|------------------|-------------------|
| <b>Reporting EU/EEA region</b> |                   |                   |                             |                              |                  |                  |                  |                    |                             |                           |                  |                   |
| Eastern EU/EEA countries       | 4,422<br>(5.7%)   | 3,745<br>(7.8%)   | 221<br>(4.2%)               | 456<br>(1.9%)                | 32<br>(1.0%)     | 189<br>(4.9%)    | 357<br>(11.4%)   | 10<br>(0.1%)       | 33<br>(0.6%)                | 37<br>(1.6%)              | 19<br>(0.8%)     | 1,277<br>(9.8%)   |
| Southern EU/EEA countries      | 13,344<br>(17.3%) | 9,078<br>(18.9%)  | 323<br>(6.1%)               | 3,943<br>(16.7%)             | 408<br>(13.3%)   | 436<br>(11.3%)   | 316<br>(10.1%)   | 1,327<br>(14.8%)   | 1,407<br>(27.5%)            | 234<br>(10.4%)            | 138<br>(5.5%)    | 1,001<br>(7.7%)   |
| Western EU/EEA countries       | 53,689<br>(69.8%) | 32,678<br>(68.0%) | 4,242<br>(80.3%)            | 16,769<br>(71.0%)            | 2,298<br>(75.1%) | 2,896<br>(75.0%) | 2,177<br>(69.3%) | 6,813<br>(76.2%)   | 3,092<br>(60.4%)            | 1,608<br>(71.5%)          | 2,127<br>(84.1%) | 10,090<br>(77.5%) |
| Northern EU/EEA countries      | 5,466<br>(7.1%)   | 2,522<br>(5.3%)   | 494<br>(9.4%)               | 2,450<br>(10.4%)             | 320<br>(10.5%)   | 342<br>(8.9%)    | 290<br>(9.2%)    | 790<br>(8.8%)      | 585<br>(11.4%)              | 371<br>(16.5%)            | 246<br>(9.7%)    | 644<br>(4.9%)     |



**Table S4.** Modified Poisson model stratified by sex. Prevalence ratios and 95% confidence intervals for all reported new HIV diagnoses (2014–2023), with an explanatory variable for migrants vs. non-migrants.

|                                 | PR <sup>1</sup> | 95% CI <sup>1</sup> | PR <sup>1</sup> | 95% CI <sup>1</sup> |
|---------------------------------|-----------------|---------------------|-----------------|---------------------|
|                                 | Men             |                     | Women           |                     |
| <b>Migration status</b>         |                 |                     |                 |                     |
| Non-migrants                    | Ref.            | Ref.                | Ref.            | Ref.                |
| Migrants born in the EU/EEA     | 1.06            | 1.02, 1.10          | 1.25            | 1.15, 1.36          |
| Migrants born out the EU/EEA    | 1.19            | 1.17, 1.22          | 1.31            | 1.26, 1.36          |
| <b>Time period of diagnosis</b> |                 |                     |                 |                     |
| Pre-COVID                       | Ref.            | Ref.                | Ref.            | Ref.                |
| Post-COVID                      | 1.01            | 0.99, 1.03          | 0.98            | 0.96, 1.01          |
| <b>Age group</b>                |                 |                     |                 |                     |
| ≤18                             | Ref.            | Ref.                | Ref.            | Ref.                |
| 19-29                           | 1.27            | 1.09, 1.47          | 1.14            | 0.98, 1.33          |
| 30-50                           | 1.85            | 1.59, 2.16          | 1.50            | 1.30, 1.74          |
| >50                             | 2.34            | 2.01, 2.72          | 1.78            | 1.53, 2.06          |
| <b>Reporting EU/EEA region</b>  |                 |                     |                 |                     |
| Northern EU/EEA countries       | Ref.            | Ref.                | Ref.            | Ref.                |
| Western EU/EEA countries        | 0.87            | 0.84, 0.90          | 0.88            | 0.84, 0.93          |
| Eastern EU/EEA countries        | 0.98            | 0.94, 1.04          | 1.11            | 1.03, 1.20          |
| Southern EU/EEA countries       | 1.09            | 1.06, 1.13          | 1.00            | 0.95, 1.06          |
| <b>Mode of transmission</b>     |                 |                     |                 |                     |
| Heterosexual transmission       | Ref.            | Ref.                | Ref.            | Ref.                |
| Injecting drug use              | 0.92            | 0.89, 0.96          | 0.90            | 0.82, 0.99          |
| Sex between men                 | 0.70            | 0.69, 0.72          |                 |                     |
| Mother to child transmission    | 1.86            | 1.52, 2.29          | 1.09            | 0.80, 1.48          |
| Other routes                    | 1.20            | 1.04, 1.39          | 0.99            | 0.84, 1.17          |

<sup>1</sup>PR = Prevalence Ratio, CI = Confidence Interval, Ref= Reference category. Note: For each stratum, the model estimates report the Prevalence Ratio (PR), obtained by exponentiating the  $\beta$  coefficients from the modified Poisson model estimation, along with the corresponding 95% confidence intervals (CIs). Countries excluded from the analyses were: Bulgaria, Croatia, Finland, Hungary, Italy, Lithuania, Malta, Poland, Romania, Slovenia and Spain because were unable to classify diagnoses as either new or previously positive.
